# Supplementary material for: Artificial intelligence in neurodegenerative disease research: use of IBM Watson to identify additional RNA-binding proteins altered in amyotrophic lateral sclerosis
Source: Springer Nature journal article supplement (doi:10.1007/s00401-017-1785-8), 2017-11-13
Supplement: MOESM9 [file 15219636]

# **Artificial Intelligence in neurodegenerative disease research: Use of IBM Watson to identify additional RNA binding proteins altered in amyotrophic lateral sclerosis**

**Authors:** Nadine Bakkar<sup>1</sup>, Tina Kovalik<sup>1</sup>, Ileana Lorenzini<sup>1</sup>, Scott Spangler<sup>2</sup>, Alix Lacoste<sup>3</sup>, Kyle Sponaugle<sup>1</sup>, Philip Ferrante<sup>1</sup>, Elenee Argentinis<sup>3</sup>, Rita Sattler<sup>1</sup>, Robert Bowser<sup>1\*</sup>

**Journal Name:** Acta Neuropathologica

## **Affiliations:**

<sup>1</sup>Department of Neurobiology, Barrow Neurological Institute, Phoenix, AZ USA.

<sup>2</sup>IBM Research – Almaden, San Jose, CA USA.

<sup>3</sup>IBM Watson Health, New York, NY USA.

\*To whom correspondence should be addressed: Robert Bowser, Department of Neurobiology, Barrow Neurological Institute, 350 W Thomas Road, Phoenix, AZ 85213.  
Email: [Robert.bowser@dignityhealth.org](mailto:Robert.bowser@dignityhealth.org).

## Supplementary Pseudocode

```
public static void run(DocumentList dl, String membership[]) {  
  
    // From the set of documents given as input, create a feature space  
  
    // Parse each document as a set of white space delimited strings. Remove  
stopwords.  
    //  
    Dictionary dict = dictionary.process(dl,"stopWords.txt");  
  
    // Find the most frequently occurring words and two word phrases  
(Bigrams). Let the most frequent 25,000 of these be the features.  
    TextClustering tc = new TextClustering(dl,dict);  
  
    //Create a matrix of feature occurrences over the document collection  
    // Label each document based on the query that generated it.  
    tc.computeMembership(m);  
  
  
    // Calculate Centroids – TFIDF feature basis  
    int doccounts[] = Taxonomy.getTermDocumentCountTotals(tc);  
    for (int i=0; i<tc.nclusters; i++) {  
        int ccounts[] = Taxonomy.getTermClusterDocumentCounts(tc, i);  
        for (int j=0; j<tc.attribNames.length; j++) {  
            if (doccounts[j]==0 || tc.getClusterSizes()[i]==0)  
                tc.centroids[i][j] = 0;  
            else tc.centroids[i][j] =  
1.0F*ccounts[j]*tc.ndata/(1.0F*doccounts[j]*tc.getClusterSizes()[i]);  
        }  
    }  
  
    // Calculate distances between centroids.  
    // The Cosine distance between document vectors (X,Y) is defined to be:
```

$$\cos(X, Y) = \frac{X \cdot Y}{||X|| \cdot ||Y||}.$$

```
        float distances[][] = new float[tc.nclusters][tc.nclusters];  
        float ss[] = new float[tc.nclusters];  
        for (int i=0; i<ss.length; i++)  
        {  
            ss[i] =  
(float)Math.sqrt(Util.dotProduct(tc.centroids[i],tc.centroids[i]));
```

```

    }
    for (int i=0; i<result.length; i++)
    {
        for (int j=i+1; j<result.length; j++)
        {
            float denom = ss[i]*ss[j];
            result[i][j] =
distance(tc.centroids[i],tc.centroids[j],denom);
        }
    }

```

///Nearest Neighbor calculate result. This finds the distance from each candidate to the nearest known positive.

```

result = new double[x.tc.nclusters];
for (int i=0; i<result.length; i++) {
    for (int j=0; j<x.hotNodes.length; j++) {
        if (x.hotNodes[j]) {
            if (i==j) result[i]++;
            else {
                if (i==j) result[i]=1.0F;
                else if (distances[i][j]>result[i]) result[i] = distances[i][j];
            }
        }
    }
}

```

// Diffusion calculate result.

// The labelvector matrix contains a 1.0 if the entity is a known entity, and 0.0 otherwise.

```

double degreematrix[] = new double[d.length];
labelvector = new double[d.length];
String cn[] = new String[tc.clusterNames.length];
for (int i=0; i<cn.length; i++) cn[i] = tc.clusterNames[i].replaceAll("\\", "");
for (int i=0; i<labels.length; i++) {
    int pos = Util.findPosition(labels[i],cn);
    if (pos==-1) System.out.println("label not found: " + labels[i]);
    else labelvector[pos] = 1.0;
}

```

// k is set to be the square root of the number of entities in the analysis. We create a new distance matrix that has a 1.0 if the entity of the column is the kth closest to the entity in the row, and a 0.0 otherwise. This is the “adjacency matrix”.

```
int k = (int)Math.sqrt(distances.length);
```

```
for (int i=0; i<distances.length; i++) {  
    int order[] = Index.run(distances[i]);  
    order = Util.reverse(order);  
    for (int j=0; j<order.length; j++) {  
        if (j<k) {  
            distances[i][order[j]] = 1.0;  
        }  
        else distances[i][order[j]] = 0.0;  
    }  
}
```

```
for (int i=0; i<distances.length; i++) {  
    for (int j=0; j<distances[i].length; j++) {  
        if (distances[i][j] == 0.0)  
            distances[i][j] = distances[j][i];  
        if (i==j) distances[i][j] = 0.0;  
    }  
}
```

// the degree matrix contains the number of ones for each entity.

```
for (int i=0; i<distances.length; i++) {  
    for (int j=0; j<distances[i].length; j++) {  
        if (distances[i][j] > 0)  
            degreematrix[i]++;  
    }  
}
```

// the laplacian is the degreematrix minus the distance matrix.

```
double laplacian[][] = new double[distances.length][distances.length];  
for (int i=0; i<distances.length; i++) {  
    for (int j=0; j<distances.length; j++) {  
        if (i==j) laplacian[i][j] = degreematrix[i] - distances[i][j];  
        else laplacian[i][j] = -distances[i][j];  
    }  
}
```

//alpha is 1/Max(laplacian)

```
double alpha = 0.0;  
for (int i=0; i<distances.length; i++) {  
    double sumrow = 0.0;
```

```

        for (int j=0; j<distances.length; j++) {
            sumrow = sumrow + Math.abs(laplacian[i][j]);
        }
        if (sumrow>alpha) alpha = sumrow;
    }
    alpha = 1.0/alpha;

// the matrix A is used to solve for Ax=labelvector. It is alpha times the laplacian
//except on the diagonal, where it is 1+alpha*laplacian.
    double A[][] = new double[distances.length][distances.length];
    for (int i=0; i<distances.length; i++)
        for (int j=0; j<distances.length; j++) {
            if (i==j)
                A[i][j] = 1.0+(alpha*laplacian[i][j]);
            else A[i][j] = alpha*laplacian[i][j];
        }

    result = SolveDiffusion.solve(A, labelvector );

//this subroutine, available in Matlab, will simulate exactly what we do in our code:
https://www.mathworks.com/help/matlab/ref/symmlq.html?s\_tid=gn\_loc\_drop

```

#### DIFFUSION SUBROUTINE:

SET error tolerance to 1d-12;  
 SET number of iterations to 1000;  
 CALL symmlq(A, Label Vector, tolerance, iterations) to GET prediction vector f  
 RETURN f  
 Define  $f$ : (a set of continuous labels,  $f$  (i.e. how likely a RBP is to be linked to ALS))

“We solve for  $f$  by minimizing the sum of the loss and smoothing functions:

$$(f - y)^T (f - y) + \mu f^T L f$$

The first term, the loss function, represents the difference between initial  $y$  and final labels  $f$ . During diffusion, this function regulates and prevents the loss of the initial labels. The second term, the smoothing function, represents the smoothness of the new labels  $f$  in the context of the Laplacian matrix  $L$ . The Laplacian matrix is the matrix representation of the kinase network and defined  $L = D - A$ . The adjacency matrix, denoted  $A$ , specifies if kinase  $i$  is connected to kinase  $j$  where  $A(i, j) = 1$  if the entities are connected and  $A(i, j) = 0$  otherwise. The degree matrix,  $D$ , is a diagonal

matrix given by  $D_{ii} = \sum_j A(i, j)$ . The diffusion coefficient  $\mu$  balances the loss of the initial labels against the smoothness. The previous equation has a closed form solution [2]:

$$f = (I + \mu L)^{-1} y$$

where  $I$  is the Identity matrix. We set the diffusion coefficient  $\mu$  to the inverse of the Laplacian's norm

$$m = \frac{1}{\max_i(\sum_k L_{ik})}$$

This value insures that the Hessian is positive definite and the above function is convex. In order to identify new kinases, we then look at the new labels  $f$  where the labels with the largest increase will be our targets."

[Spangler, Scott, et al. "Automated hypothesis generation based on mining scientific literature." *Proceedings of the 20th ACM SIGKDD international conference on Knowledge discovery and data mining*. ACM, 2014.]

}

// subroutine for comparing two vectors - Cosine Distance

```
public static float distance(float x[], float y[], float denom)
{
    if (Util.add(x)==0 || Util.add(y)==0) return(1.0F);

    float val = 0.0F;
    float sum = 0.0F;
    for (int i=0;i<x.length;i++)
    {
        val = x[i]*y[i];
        sum+= Math.abs(val);
    }

    if (denom>0) return(sum/denom);
    return(sum);
}
```
